1 **Title:**

2 **Functional channels in mature *E. coli* colonies**

3 **Authors:**

4 Liam M. Rooney <sup>1\*</sup>, William B. Amos <sup>2</sup>, Paul A. Hoskisson <sup>1</sup> and Gail McConnell <sup>2</sup>

5 **Author Affiliations:**

6 1. Strathclyde Institute of Pharmacy and Biomedical Sciences, University of Strathclyde, 161  
7 Cathedral Street, Glasgow, G4 0RE, United Kingdom

8 2. Department of Physics, SUPA, University of Strathclyde, 107 Rottenrow East, Glasgow,  
9 G4 0NG, United Kingdom

10 \*Correspondence: [liam.rooney@strath.ac.uk](mailto:liam.rooney@strath.ac.uk)

11 **ORCID Identifiers:**

12 Liam M. Rooney – 0000-0002-2237-501X

13 William B. Amos – 0000-0001-9979-5920

14 Paul A. Hoskisson – 0000-0003-4332-1640

15 Gail McConnell – 0000-0002-7213-0686

16 Word count (minus Abstract, Methods, References, Figures & legends): 3001

17 **Abstract**

18 Biofilms are important in medicine, industry and the natural environment, however their structure  
19 is largely unexplored across multiple spatial scales. We have studied the architecture of mature  
20 *Escherichia coli* macro-colony biofilms by means of the Mesolens, an optical system which  
21 uniquely allows simultaneous imaging of individual bacteria and over one hundred cubic  
22 millimetres of its biofilm milieu. Our chief finding is the presence of intra-colony channels on the  
23 order of 10  $\mu\text{m}$  in diameter in *E. coli* biofilms. These channels have a characteristic structure and  
24 reform after total mechanical disaggregation of the colony. We present evidence that the channels  
25 transport particles and function to assist the absorption of nutrients. These channels potentially  
26 offer a new route for the delivery of dispersal agents or antimicrobial drugs to biofilms, ultimately  
27 lowering their impact on public health and industry.

## 28 Introduction

29 Though often inconspicuous, biofilms are one of the most prolific and metabolically active  
30 environments on Earth. Biofilms are aggregate communities of microbes held together by  
31 extracellular matrices containing extracellular polysaccharides (EPS) and nucleic acids<sup>1,2</sup>. These  
32 microbial communities can be composed of one or more species (mono/poly-microbial) and are  
33 found in almost every ecological niche<sup>3</sup>. The protective matrix enveloping the biofilm confers  
34 resistance to desiccation and exposure to diffusing agents such as biocides or antibiotics<sup>4-8</sup>, in  
35 turn promoting the development and spread of antimicrobial resistance<sup>9</sup>. Consequently, the study  
36 of biofilm structure is vital to understanding and combatting the development of resistance and  
37 lowering the clinical and industrial burden of biofilms. The 3D organisation of biofilms can take  
38 many forms<sup>10-13</sup>; for example, mushroom-shaped biofilms grown in liquid flow systems, thin sheet-  
39 like biofilms in static liquid systems, pellicle biofilms grown at liquid/air interfaces, and macro-  
40 colony biofilms grown on solid surfaces. Although morphologically distinct, what classifies these  
41 structurally-different communities as 'biofilms' lies with their shared fundamental biochemical  
42 signals and pathways<sup>3</sup>.

43 Dynamic computational modelling programmes, such as CellModeller<sup>14,15</sup>, have been routinely  
44 used to predict the spatial patterning and arrangement of cells within bacterial communities<sup>14-18</sup>.  
45 *In silico* models primarily show growth of polymicrobial communities where cell shape, size,  
46 surface properties and cell-cell interactions influence the spatial organisation of the mature  
47 biofilm, resulting in sectoring of different strains into distinct populations, which has been validated  
48 experimentally<sup>19-23</sup>. However, *in silico* modelling has shown little evidence of structural ordering  
49 or complex spatial patterning, and a lack of effective multi-scale imaging techniques has  
50 presented little experimental evidence of 3D structure within mono-strain biofilms.

51 There has been much imaging of living biofilms. For example, the density-dependent phage  
52 sensitivity in *Escherichia coli* colonies has been studied<sup>24</sup>, the biofilms present on human tooth  
53 enamel have been imaged at different pH levels<sup>25</sup>, and synchronies of growth and electrical  
54 signalling between adjacent bacterial colonies have been observed<sup>26</sup>. Such studies have exposed  
55 a gap in the repertoire of the optical microscope in that either microbes could be individually  
56 imaged with a high-power objective lens, or the overall structure could be viewed at low  
57 magnification with resolution so poor, particularly in depth, that individual microbial cells could not  
58 be seen. To address this, we use the Mesolens to image intact live macro-colony biofilms *in situ*  
59 with isotropic sub-cellular resolution. In essence, the Mesolens is a giant objective lens with the  
60 unique combination of 4x magnification with a numerical aperture (NA) of 0.47; which is

61 approximately five-times greater than that of a conventional 4x objective lens<sup>27</sup>. The low  
62 magnification coupled with a high NA result in a field of view (FOV) measuring approximately 6  
63 mm<sup>2</sup> with lateral resolution of 700 nm and 7 µm axially, while the lens prescription provides a  
64 working distance of 3 mm. Moreover, the lens is chromatically corrected across the visible  
65 spectrum and designed to be compatible with various immersion routines. While the Mesolens  
66 has proven to be a powerful tool in neuroscience, developmental biology and pathology<sup>27–29</sup>, it  
67 also presents an untapped technology for biofilm imaging, where we can image whole live  
68 microbial communities with unprecedented detail within a single dataset without additional  
69 processing or stitching and tiling.

70 We explored the internal architecture of mature *E. coli* macro-colony biofilms using a novel  
71 mesoscopic imaging approach. We identified and characterised a previously undocumented  
72 channel system within *E. coli* biofilms. These channels allow for nutrient uptake from the external  
73 environment, which offers a novel mechanism for nutrient delivery in microbial communities  
74 beyond passive diffusion; which is widely accepted as the main route of delivery for any external  
75 compounds to enter a biofilm, whether they be nutrients or antimicrobial drugs<sup>15,16,14,17</sup>. Using  
76 fluorescent probes, we determined that intra-colony channels have a significant protein  
77 component. Additionally, we demonstrated that intra-colony channels form as an emergent  
78 property of biofilm formation in *E. coli*. These findings provide novel understanding of how spatial  
79 organisation in bacterial biofilms contributes to their ability to transport material from the external  
80 environment – a function which could be exploited to target biofilm dispersal agents and  
81 antimicrobial drugs to lower the burden of biofilms on public health.

## 82 Results

### 83 Identification of a network of intra-colony channels in *E. coli* biofilms

84 We investigated the internal architecture of *E. coli* macro-colony biofilms using conventional  
85 widefield epi-fluorescence microscopy, widefield mesoscopy and confocal laser scanning  
86 mesoscopy. Using widefield mesoscopy we discovered that *E. coli* (JM105) biofilms contain a  
87 network of channel-like structures which permeate the biofilm and travelled from the centre to the  
88 leading edge. The channels measure approximately 15 µm wide and appear as non-fluorescing  
89 regions within the biofilm which are lined by individual cells in a pole-to-pole arrangement. We  
90 applied a Classic Maximum Likelihood Estimation deconvolution algorithm to a z-stack acquired  
91 using the Mesolens in widefield epi-fluorescence mode to improve image quality and reveal the

92 arrangement of individual cells in a mature macro-colony biofilm. We then applied a colour-coded  
93 look-up table (LUT) according to the axial position of each optical section within the 36  $\mu\text{m}$ -thick  
94 z-stack (Figure 1). From the axial-coded LUT we can see that the intra-colony channels are not  
95 merely 2D lateral arrangements of cells, but that the channels have a 3D topography within the  
96 context of the biofilm, resembling canyons and ravines rather than enclosed capillaries.

97 Additionally, we imaged JM105 biofilms using confocal mesoscopy to ensure that the  
98 deconvolution algorithm that we used when processing widefield Mesolens data did not introduce  
99 erroneous structural artefacts. Confocal microscopy provides a marked improvement in signal-to-  
100 noise ratio compared to widefield techniques, particularly with thick specimens, resulting in a  
101 similar image quality to a deconvolved widefield dataset. Confocal mesoscopy revealed the same  
102 channel structures that we identified in widefield imaging experiments presented in Figure 1  
103 (Supplementary Figure 2, Supplementary Movie 1). This concludes that the structures we  
104 observed were not introduced as an artefact of image processing.

105 To demonstrate the benefit of using the Mesolens over conventional microscopes for imaging live  
106 biofilms, we also imaged biofilms using a conventional upright widefield epi-fluorescence  
107 microscope with a low-magnification, low-NA lens (4x/0.13 NA). We compared the ability of the  
108 Mesolens and the conventional microscope to resolve the intra-colony channels and found that  
109 there was a clear improvement in the spatial resolution with the Mesolens (Supplementary Figure  
110 3). The resolution improvement applies to both lateral and axial resolution, and establishes the  
111 Mesolens as an ideal imaging technology for 3D imaging of large microbiological specimens with  
112 sub-micron resolution.

### 113 **A structural assessment of intra-colony channels**

114 The channel structures we have identified appear as dark regions within the biofilm, and so we  
115 hypothesised that they contained some form of structural matrix. We began investigating the  
116 structural makeup of the channels by determining if they were filled with materials of differing  
117 refractive index compared to that of the biomass. Possible candidates were solid growth medium  
118 which was forced upward during biofilm growth, or air which was trapped in the biofilm. We used  
119 reflection confocal mesoscopy where signal is detected from reflections of incident light at  
120 refractive index boundaries, such as those between bacterial cells and the surrounding growth  
121 medium. A maximum intensity projection of an unlabelled *E. coli* JM105 biofilm acquired in  
122 reflection confocal mode showed no reflection signal resembling the intra-colony channels which  
123 we report (Figure 2a). This informs us that the channels must be of a similar refractive index to  
124 the surrounding biomass and biofilm matrix and are not occupied by solid growth medium or air.

125 To determine if the channel structures we observe were occupied by non-viable/non-fluorescing  
126 cells, biofilms were grown in the presence of the viability dye, Sytox Green. This dye has an  
127 emission peak at 523 nm enabling the use of HcRed1 ( $\lambda_{em}$ . 618 nm) expressing JM105 *E. coli*  
128 cells for two-colour imaging. Figure 2b shows a false-coloured composite maximum intensity  
129 projection of a JM105-miniTn7-*HcRed1* biofilm stained with Sytox Green acquired using widefield  
130 mesoscopy, where live cells are presented in cyan and non-viable cells are shown in yellow. We  
131 subtracted the signal of the non-viable cells from HcRed1-expressing cells to prevent spectral  
132 overlap in the emission of the two fluorophores, meaning that no Sytox-labelled cells were falsely  
133 presented in cyan. We observed that viable and non-viable cells formed two distinct domains  
134 within the colony. Here, non-viable cells cluster in the centre of the biofilm while intra-colony  
135 channels are not occupied by non-viable/non-fluorescent cells.

136 To investigate whether intra-colony channels were filled with exopolysaccharides (EPS) secreted  
137 by bacteria within the biofilm, we grew JM105 biofilms in the presence of the lectin binding dye  
138 conjugate Alexa594-Wheat germ agglutinin (WGA). Figure 2c shows a deconvolved composite  
139 image of a JM105-miniTn7-*gfp* biofilm (green) and associated EPS (magenta).  
140 Exopolysaccharides are distributed throughout the entire biofilm and are not strictly localised  
141 within the channel structures. We assessed lipid distribution using the lipid-binding dye Nile Red,  
142 which showed that intra-colony channels are not composed of a lipid matrix (Figure 2d).  
143 Extracellular proteins were stained using the protein-specific fluorescent dye, SYPRO Ruby. The  
144 intra-colony channels contained extracellular protein (Figure 2e). The finding that the channels  
145 are filled by a protein matrix suggests that they arise not due to some stochastic process and that  
146 the channels have some function.

#### 147 **Channels emerge as an inherent property of biofilm formation**

148 To determine whether the formation of intra-colony channels arose as an emergent property of  
149 biofilm formation, we investigated if the structures were able to re-form following disruption. We  
150 allowed the biofilm to establish the formation of channels (Figure 3a) and then disturbed the  
151 colony, by mixing to create a uniform mass of cells. Following a recovery period of 10 hours, the  
152 channels reformed in the regrowing regions of the biofilm (Figure 3b). The ability of the channels  
153 to form in the same way as a naïve colony suggests that they form as an emergent property of *E.*  
154 *coli* colonial growth on a solid surface.

#### 155 **Channels are unable to cross strain boundaries in mixed isogenic cultures**

156 Growth of two isogenic strains in co-culture, each expressing a different photoprotein, two strains  
157 formed sectors as has been previously described<sup>18–20,22,21,23</sup>. We wished to explore this sectoring  
158 property in the context of intra-colony channel formation and to determine if the channels were  
159 shared between the strains. When the two isogenic strains sector, the channels do not intersect  
160 the boundary between the strains and are retained within the own sector (Figure 4). The  
161 confinement of channels was more evident between different populations (i.e. HcRed1 and GFP-  
162 expressing), whereas the boundaries between sectors of cells expressing the same photoprotein  
163 were less ordered.

#### 164 **Intra-colony channels present a novel nutrient acquisition system in *E. coli* biofilms**

165 To investigate whether the intra-colony channels play a role in the transport of substances into  
166 the biofilm, the functional role of the channel system was tested by introducing 200 nm diameter  
167 fluorescent microspheres to the extracellular medium when preparing the specimen for widefield  
168 mesoscopy. The fluorescent microspheres were spread as a dense lawn along with a dilute mid-  
169 log JM105-miniTn7-*gfp* culture. A single optical section, 25  $\mu\text{m}$  above the base of the colony,  
170 allows the outline of the colony to be observed at the edges of the image, with the untouched  
171 lawn of microspheres outside the colony (Figure 5a). The distribution of beads in these areas are  
172 homogenous, whereas within the colony the transport of the fluorescent microspheres through  
173 the channels reflects the spatial structure of the biofilm. Magnified regions of interest (ROI) of  
174 intra-colony channels show that the channels are acting as conduits for the transport of  
175 microspheres into the biofilm (Figure 5b). The transport of microspheres into the channels  
176 suggests that these intra-colony structures are involved in the acquisition of substances from the  
177 external environment. We suggest the ability of channels to transport small fluorescent particles  
178 could be extended to facilitate uptake of smaller particles into the colony, such as nutrients.

179 To further investigate the role of intra-colony channels in biofilm nutrient acquisition, an arabinose  
180 inducible GFP strain (*E. coli* JM105 P<sub>BAD</sub>-*gfp*) was used. Growth of the arabinose-inducible GFP  
181 strain on solid minimal medium with L-arabinose as the sole carbon source revealed the biofilm  
182 fluoresced most intensely in regions which bordered the intra-colony channels (Figure 6). This  
183 suggests that the concentration of L-arabinose is highest in the channel system compared to the  
184 remainder of the biofilm and demonstrates the role of these structures in nutrient acquisition and  
185 transport within the colony. This finding challenges the long-held belief that bacterial colony  
186 nutrient uptake occurs through simple diffusion through the extracellular matrix of the biofilm, and  
187 concurs with previous work which suggested that large biofilms must develop transport  
188 mechanisms to direct nutrients to their centre<sup>1</sup>.

## 189 Discussion

190 This study is the first application of the Mesolens to microbiology and has offered a new approach  
191 for imaging large microbial specimens, enabling us to characterise a novel structural aspect of *E.*  
192 *coli* macro-colony biofilms. The channel structures reported are formed as an emergent property  
193 of biofilm growth and are confined within founder cell boundaries in mixed isogenic cultures. We  
194 have also established a functional role for intra-colony channels in nutrient acquisition and  
195 transport. The identification and characterisation of these previously undocumented channels  
196 offers a novel outlook for microbial community biology and provides a novel mechanism for  
197 nutrient delivery in bacterial biofilms.

198 Previous biofilm imaging studies have mainly used conventional widefield and laser scanning  
199 microscopy to study biofilm architecture, which are inherently limited by sacrificing spatial  
200 resolution and imaging volume. For example, automated tile-scanning microscopes which change  
201 the location of the FOV or focal plane have been used to image growing colonies from  $1 \times 10^1$ -  
202  $1 \times 10^4$  cells<sup>30-32</sup>; however, this method often requires long acquisition periods and results in tiling  
203 artefacts. With the Mesolens we negate the need for stitching and tiling when imaging multi-  
204 millimetre specimens and can image beyond small bacterial aggregates to visualise live bacterial  
205 macro-colonies in excess of  $1 \times 10^9$  cells while maintaining sub-micron resolution throughout the  
206 entire 6 mm<sup>2</sup> field. Therefore, in comparison with other conventional large specimen imaging  
207 techniques, the Mesolens stands as a novel and improved method for *in situ* imaging of live  
208 bacterial communities. Additionally, recent advances in light sheet microscopy<sup>33</sup> and multi-photon  
209 microscopy<sup>34,35</sup> have been applied to biofilm imaging. However, these methods currently cannot  
210 resolve sub-micron information over multi-millimetre scales, as with the Mesolens. The same  
211 problem accompanies ultrasound<sup>36,37</sup>, optical coherence tomography and photoacoustic  
212 tomography<sup>38-40</sup> methods used for mesoscale biofilm imaging, where they cannot properly resolve  
213 structures on the order of which we report. We have also studied images of bacterial macro-  
214 colonies under a widely available conventional stereomicroscope. Careful comparison with  
215 Mesolens images suggests that traces of the channel may be faintly visible in spite of the low  
216 resolution of stereomicroscopes in x, y and particularly z-dimensions.

217 The structures we have identified bear similarities to some other aspects of bacterial community  
218 architecture, however it is important to note that the channels we identify are fundamentally  
219 different to structures such as the water irrigation channels discovered in mushroom-shaped  
220 *Pseudomonas* and *Klebsiella* spp. biofilms<sup>41,42</sup>. There have also been channel-like structures  
221 identified in mature bacterial colonies, such as the crenulations of *B. subtilis* macro-colonies<sup>43,44</sup>

222 or the macroscopic folds of *P. aeruginosa* biofilms<sup>45,46</sup>, which have been extensively described in  
223 literature. It is important to note, that crenulations and folds are all visible as surface structures of  
224 the colony and resolvable using photography techniques, whereas the intra-colony channels  
225 identified here are present within the main body of the biofilm and are not observable by viewing  
226 the surface of the colony. A similar phenomenon was recently reported in colonies of *Proteus*  
227 *mirabilis* where 100 nm diameter fluorescent microspheres were observed to penetrate the  
228 boundary of the colony through “crack-like conduits” present at the colony edge<sup>55</sup>. However, the  
229 authors were unable to show any spatial evidence of the conduits themselves.

230 The spatial arrangement of the intra-colony channels is fractal in nature, with repeating patterns  
231 and complex topographies. Upon first glance, channels resemble fractal features found in multi-  
232 strain colonies which form as a result of the mechanical instability between growth and viscous  
233 drag of dividing cells<sup>19</sup>. However, these features have only been reported in multi-strain colonies  
234 where the fractal dendrites have been composed of live, fluorescing cells<sup>20–23,47</sup>. We demonstrate  
235 that the spatial patterns we observe are different to those outlined previously. Firstly, the patterns  
236 we observe arise in a single population of cells where there are no strain-to-strain interactions to  
237 result in the formation of fractal patterns. Given that the intra-colony channels are not occupied  
238 by dead non-fluorescing cells (Figure 2b) it is clear that the bacterial colonies used in this work  
239 are not composed of two pseudo-domains (i.e. viable and non-viable cells) which could interact  
240 to form complex 3D fractal patterning. Our finding that non-viable cells localise in the centre of  
241 the biofilm agrees with previous studies showing that dense microbial aggregates often have  
242 dense hypoxic, acidic centres which have diminished access to nutrients<sup>11,12,34,48–52</sup>.

243 The intra-colony channels form as an inherent property of biofilm formation, leading to fractal-like  
244 patterns which exhibit plasticity which is reminiscent of the results of a classical eukaryotic  
245 developmental biology experiment by Moscona, where reformation of the channel architecture in  
246 marine sponges occurred after disaggregation by passage through a fine silk mesh<sup>53,54</sup>. The ability  
247 of the channels to reform also suggests that they fulfil a functional role in the context of the biofilm.

248 In summary, we have identified a previously undocumented nutrient uptake system in colonial  
249 biofilms which challenge the current belief that cells which are out with the reach of underlying  
250 nutrient-rich medium are able to gain nutrients beyond simple diffusion through the base of the  
251 biofilm<sup>14–17</sup>. The presence of these channels may represent a route to circumvent the chemical  
252 protection and resistance phenotype of bacterial biofilms<sup>56</sup>, such that rather than applying drugs  
253 to the apical surface of the biofilm it may be possible to exploit the intra-colony channels for  
254 delivery of antimicrobial agents. The identification and characterisation of an intra-colony channel



255 network could therefore have far-reaching applications to public health and disease prevention,  
256 while providing another understanding on the delivery of nutrients to the centre of densely packed  
257 microbial communities.

## 258 **Materials and Methods**

### 259 **Designing and 3D-printing a chamber slide for biofilm imaging**

260 A custom imaging chamber was designed using AutoCAD (Autodesk, USA) with the purpose of  
261 imaging large-scale cultured bacterial communities *in situ* using the Mesolens. The design  
262 consisted of a plate with dimensions 90 mm x 80 mm x 12 mm and a central well measuring 60  
263 mm in diameter with a depth of 10 mm (Supplementary Figure 1). The imaging chamber was 3D-  
264 printed using black ABS plastic (FlashForge, Hong Kong) with a FlashForge Dreamer 3D printer  
265 (FlashForge, Hong Kong). The chamber slide was sterilised prior to use with 70% ethanol and  
266 UV irradiation for 15 minutes.

### 267 **Bacterial strains and growth conditions**

268 All experiments were performed using the *E. coli* strains outlined in Supplementary Table 1.  
269 Colony biofilms were grown by inoculating a lawn of cells at a density of  $1 \times 10^4$  cfu/ml on either  
270 solid LB medium or M9 minimal medium<sup>57</sup> supplemented with the appropriate selective antibiotic  
271 to achieve single colonies. The colonies were grown in the 3D-printed imaging mould at 37°C for  
272 18-24 hours in darkened conditions prior to imaging.

### 273 **Specimen preparation**

274 For colony imaging alone, colonies were submerged in sterile LB broth (refractive index ( $n$ ) =  
275 1.338) as a mounting medium following the allocated growth time prior to imaging. A large  
276 coverglass was placed over the central well of the imaging mould (70 mm x 70 mm, Type 1.5,  
277 0107999098 (Marienfeld, Lauda-Koenigshofen, Germany)), and the colonies were then imaged  
278 using either the Mesolens or a conventional widefield epi-fluorescence microscope to compare  
279 their performance and to justify using the Mesolens to study biofilm architecture over conventional  
280 techniques.

281 The refractive index of the LB mounting medium was measured using an Abbe Refractometer  
282 (Billingham & Stanley Ltd., U.K.) which was calibrated using Methanol at 21°C.

### 283 **Conventional widefield epi-fluorescence microscopy**

284 Colony biofilms were imaged on a conventional an Eclipse E600 upright widefield epi-  
285 fluorescence microscope (Nikon, Japan) equipped with a 4x/0.13 NA PLAN FLUOR objective lens  
286 (Nikon, Japan). GFP excitation was provided by a 490 nm LED from a pE-2 illuminator (CoolLED,  
287 U.K.), and emission was detected using a bandpass filter (BA 515-555 nm, Nikon, Japan) placed  
288 before an ORCA-spark digital CMOS camera (Hamamatsu, Japan). The camera detector was  
289 controlled using WinFluor software<sup>58</sup>. Colonies were imaged after 20 hours of growth in an  
290 imaging mould as described above.

### 291 **Widefield epi-fluorescence mesoscopy**

292 Specifications of the Mesolens have been previously reported<sup>27</sup>, and therefore only the imaging  
293 conditions used in this study will be outlined here. GFP excitation was achieved using a 490 nm  
294 LED from a pE-4000 LED illuminator (CoolLED, U.K.). A triple bandpass filter which transmitted  
295 light at  $470 \pm 10$  nm,  $540 \pm 10$  nm and  $645 \pm 50$  nm was placed in the detection pathway. The  
296 emission signal was detected using a VNP-29MC CCD camera with chip-shifting modality  
297 (Vieworks, South Korea) to capture the full FOV of the Mesolens at high resolution. Widefield  
298 mesoscopic imaging was carried out using water immersion ( $n = 1.33$ ) with the Mesolens'  
299 correction collars set accordingly to minimise spherical aberration through refractive index  
300 mismatch.

### 301 **Confocal laser scanning mesoscopy**

302 For laser scanning confocal mesoscopy specimens were prepared as outlined above.  
303 Fluorescence excitation of GFP was obtained using the 488 nm line set at 5 mW from a multi-line  
304 LightHUB-4 laser combiner (Omicron Laserage, Germany). The green emission signal was  
305 detected using a PMT (P30-01, Senstech, U.K.) with a 550 nm dichroic mirror (DMLP550R,  
306 Thorlabs, USA) placed in the emission path and a 525/39 nm bandpass filter (MF525-39,  
307 Thorlabs, USA) placed before the detector.

308 For reflection confocal mesoscopy incident light was sourced from a 488 nm line set at 1 mW  
309 from a multi-line LightHUB-4 laser combiner (Omicron Laserage, Germany). Reflected signal was  
310 detected using a PMT (P30-01, Senstech, U.K.) with no source-blocking filter in place.

311 Confocal laser scanning mesoscopy was carried out using type DF oil immersion ( $n = 1.51$ ) with  
312 the Mesolens' correction collars set accordingly to minimise spherical aberration through  
313 refractive index mismatch.

### 314 **Structural assessment of intra-colony channels**

315 To characterise the structure of intra-colony channels we sought to visualise the distribution of  
316 several archetypal structural components of biofilms.

317 As the biofilms in this study were submerged during imaging in a medium with known refractive  
318 index, we were able to determine if channels were filled with substances of differing refractive  
319 index (e.g. air) using reflection confocal mesoscopy as above. Solid LB was cast into a 3D printed  
320 imaging chamber and inoculated with JM105 at a density of  $1 \times 10^4$  cfu/ml and incubated for 18-24  
321 hours at 37°C in darkened conditions. Biofilms were mounted in sterile LB medium ( $n = 1.338$ )  
322 prior to imaging.

323 We then imaged the distribution of non-viable cells in the biofilm based on the approach  
324 developed by Asally<sup>43</sup>. Briefly, JM105-miniTn7-*HcRed1* colony biofilms were grown for imaging in  
325 3D-printed imaging moulds as outlined previously. LB medium was supplemented with gentamicin  
326 (20 µg/ml) and 0.5 µM Sytox green dead-cell stain (S7020, Invitrogen, USA). Cells were seeded  
327 at a density of  $1 \times 10^4$  cfu/ml and grown for 18-24 hours prior to imaging on the Mesolens in  
328 widefield epi-fluorescence mode as described above. A 490 nm and a 580 nm LED from a pE-  
329 4000 LED illuminator (CoolLED, U.K.) were used to excite Sytox Green and HcRed1 respectively.  
330 The emission signal was detected using a VNP-29MC CCD detector (Vieworks, South Korea)  
331 with 3x3 pixel-shift modality enabled and with a triple band pass filter ( $470 \pm 10$  nm,  $540 \pm 10$  nm  
332 and  $645 \pm 50$  nm) in the emission path.

333 To visualise the distribution of EPS in the biofilm we stained sialic acid and *N*-acetylglucosaminyl  
334 residues by supplementing solid M9 medium (0.2% glucose (w/v))<sup>57</sup> with 20 µg/ml gentamicin and  
335 2 µg/ml Alexa594-WGA (W11262, Invitrogen, USA) before inoculating with  $1 \times 10^4$  cfu/ml JM105-  
336 miniTn7-*gfp* and growing as previously described. We imaged EPS-stained specimens using  
337 widefield epi-fluorescence mesoscopy as before using a 490 nm LED to excite GFP and 580 nm  
338 LED to excite Alexa594-WGA.

339 We determined the lipid localisation throughout the biofilm by staining with Nile Red. We  
340 supplemented solid LB medium with 20 µg/ml gentamicin and 10 µg/ml Nile Red (72485, Sigma-  
341 Aldrich, USA) before inoculating with  $1 \times 10^4$  cfu/ml JM105-miniTn7-*gfp* and growing as previously  
342 described. We then imaged the lipid distribution in relation to the intra-colony channels using  
343 widefield epi-fluorescence mesoscopy as before using a 490 nm LED to excite GFP and 580 nm  
344 LED to excite Nile Red.

345 The protein distribution was determined by staining the biofilm with FilmTracer SYPRO Ruby  
346 biofilm matrix stain (F10318, Fisher Scientific, USA) which binds to a number of different classes  
347 of extracellular protein. Solid LB medium was prepared containing 20 µg/ml gentamicin and a final  
348 concentration of 2% (v/v) FilmTracer SYPRO Ruby biofilm matrix stain before inoculating with  
349 JM105-miniTn7-*gfp* and growing as previously described. Specimens were imaged using  
350 widefield epi-fluorescence mesoscopy. A 490 nm and a 580 nm LED from a pE-4000 illuminator  
351 (CoolLED, UK) were used for GFP and SYPRO Ruby excitation, respectively. Fluorescence  
352 emission from GFP and SYPRO Ruby were detected as outlined above. Both channels were  
353 acquired sequentially.

### 354 **Disruption and recovery of intra-colony channel structures**

355 To assess the ability of the structures we observe to recover following disruption, single colonies  
356 of JM105-miniTn7-*gfp* were grown on solid LB medium supplemented with 20 µg/ml gentamicin  
357 and allowed to grow for 10 hours at 37°C in darkened conditions. Following the initial growth step  
358 colonies were removed from the incubator and gently mixed with a sterile 10 µl pipette tip to  
359 disrupt the channel structures in the growing biofilm. Care was taken to prevent disruption to the  
360 underlying solid medium on which the colony was supported. Following disaggregation, the  
361 colonies were grown for a further 10 hours at 37°C in darkened conditions prior to imaging.  
362 Colonies were then mounted in sterile LB medium and imaged using widefield epi-fluorescence  
363 mesoscopy as described above.

### 364 **Using differentially labelled isogenic strains to observe channels in mixed cultures**

365 The phenomenon of strain sectoring has been previously documented and occurs by mechanical  
366 buckling as adjacent colonies expand into each other during radial growth<sup>18,19</sup>. We investigated  
367 whether intra-colony channels were able to cross the strain boundary between sectors by  
368 inoculating a low-density mixed culture of JM105-miniTn7-*gfp* and JM105-miniTn7-*HcRed1* at a  
369 1:1 ratio and inoculating a lawn onto solid LB medium containing 20 µg/ml gentamicin. We allowed  
370 colonies of each strain to stochastically collide into adjacent clonal populations during colony  
371 expansion and then imaged using widefield mesoscopy after incubation for 20 hours at 37°C in  
372 darkened conditions as described above. We used colony PCR to confirm that the miniTn7  
373 insertion, which contained the photoprotein gene, occurred at the same chromosomal location in  
374 both strains (*glmS* Fwd. – 5' AAC CTG GCA AAT CGG TTA C; *tn7R109* Rev. – 5' CAG CAT AAC  
375 TGG ACT GAT TTC AG). The miniTn7 transposon inserts at only one *attTn7* site in the  
376 chromosome, downstream of *glmS*<sup>59</sup>. We found that both JM105-miniTn7-*gfp* and JM105-

377 miniTn7-*HcRed1* were both inserted approximately 25 base pairs downstream of *glmS*.  
378 Therefore, there is no genotypic difference between the strains, save for the inserted photoprotein  
379 gene.

### 380 **Fluorescent microsphere uptake assay**

381 To assess the function of the structures we observe, a confluent lawn of fluorescent microspheres  
382 was seeded along with the bacterial inoculum at the culturing stage. Two-hundred nanometre  
383 multi-excitatory microspheres (Polysciences, Inc., USA) were seeded at a density of  $1 \times 10^{10}$   
384 microspheres/ml and plated along with  $1 \times 10^4$  cfu/ml JM105-miniTn7-*gfp* in a mixed-inoculum.  
385 Microsphere translocation was assessed by widefield epi-fluorescence mesoscopy as above with  
386 two-channel detection for both the GFP and microsphere fluorescence emission. A triple  
387 bandpass emission filter which transmitted light at  $470 \pm 10$  nm,  $540 \pm 10$  nm and  $645 \pm 50$  nm  
388 was place in the detection path. Sequential excitation of GFP and the fluorescent microspheres  
389 was achieved using a 490 nm and 580 nm LED, respectively, from a pE-4000 LED illuminator  
390 (CoolLED, U.K.) Each channel was acquired sequentially using a CCD camera detector (Stemmer  
391 Imaging, U.K.). All imaging was carried out using water immersion.

### 392 **Assessing the role of intra-colony channels in nutrient uptake**

393 The functional role of the structures which we observe was tested using an arabinose biosensor  
394 where GFP expression was controlled by the presence or absence of L-arabinose. The biosensor  
395 strain contained the *araBAD* operon with *gfp* inserted downstream on the promotor and *araBAD*  
396 functional genes. The biosensor strain was a gift from colleagues at the James Hutton Institute.

397 JM105 transformed with the arabinose biosensor plasmid, pJM058, were grown overnight at 37°C  
398 while shaking at 250 rpm in liquid LB medium supplemented with 25 µg/ml chloramphenicol.  
399 Overnight cultures were then diluted in fresh LB and grown until  $OD_{600} = 0.5$ . Cells were then  
400 pelleted and washed three times with 1x M9 salts. Washed cells were inoculated on to solid M9  
401 minimal medium<sup>57</sup> with L-arabinose as the sole carbon source (0.2%) at a density of  $1 \times 10^4$  cfu/ml  
402 and grown for 42-48 hours in darkened conditions at 37°C. Specimens were then prepared for  
403 imaging as outlined above.

### 404 **Image processing and analysis**

405 Widefield epi-fluorescence mesoscopy z-stacks were deconvolved where specified using with  
406 Huygens Professional version 19.04 (Scientific Volume Imaging, The Netherlands, <http://svi.nl>)  
407 using a Classic Maximum Likelihood Estimation algorithm. A theoretical point spread function was

408 generated using Huygens Professional with parameters adjusted to suit the experimental setup.  
409 Deconvolution was performed using a server with a 64-bit Windows Server 2016 Standard  
410 operating system (v.1607), two Intel® Xeon® Silver 4114 CPU processors at 2.20 GHz and 2.19  
411 GHz and 1.0 TB installed RAM. Image analysis was performed using FIJI<sup>60</sup>. Figures presented  
412 here were linearly contrast adjusted for presentation purposes where required using FIJI<sup>60</sup>.

## 413 Acknowledgements

414 The authors would like to thank Lee McCann (formerly University of Strathclyde, UK) for his  
415 technical input with the Mesolens and help with initiating the experiments. In addition, we would  
416 like to thank Ainsley Beaton (University of Strathclyde, UK) for the kind gift of the JM105-miniTn7-  
417 *gfp* and JM105-miniTn7-*HcRed1* strains, and to Morgan Feeney (University of Strathclyde) for  
418 her advice on this manuscript. We also thank Nicola Holden and Jacqueline Marshall (James  
419 Hutton Institute, UK) for the kind gift of the pJM058 plasmid which contained the P<sub>BAD</sub>-*gfp*  
420 biosensor. This work was supported by the Medical Research Council (MR/K015583/1).

## 421 Author Contributions

422 LMR conducted all experiments and analysed all data. LMR, WBA, PAH and GM were  
423 responsible for the experimental design. LMR, WBA, PAH and GM prepared the manuscript.

## 424 Competing Interests

425 The authors declare no competing interests.

## 426 Materials and Correspondence

427 Any requests for materials or correspondence should be directed to LMR.

## 428 References

- 429 1. Hogley, L., Harkins, C., MacPhee, C. E. & Stanley-Wall, N. R. Giving structure to the biofilm matrix:  
430 an overview of individual strategies and emerging common themes. *FEMS Microbiol. Rev.* **39**, 649–  
431 669 (2015).
- 432 2. Nadell, C. D., Drescher, K. & Foster, K. R. Spatial structure, cooperation and competition in biofilms.  
433 *Nat. Rev. Microbiol.* **14**, 589 (2016).

- 434 3. Flemming, H.-C. & Wuertz, S. Bacteria and archaea on Earth and their abundance in biofilms. *Nat.*  
435 *Rev. Microbiol.* **17**, 247–260 (2019).
- 436 4. Costerton, J. W. *et al.* Bacterial biofilms in nature and disease. *Annu. Rev. Microbiol.* **41**, 435–64  
437 (1987).
- 438 5. Bixler, G. D. & Bhushan, B. Biofouling: lessons from nature. *Philos. Trans. R. Soc. Math. Phys. Eng.*  
439 *Sci.* **370**, 2381–2417 (2012).
- 440 6. Chaves Simões, L. & Simões, M. Biofilms in drinking water: problems and solutions. *RSC Adv* **3**,  
441 2520–2533 (2013).
- 442 7. Percival, S. L., Suleman, L., Vuotto, C. & Donelli, G. Healthcare-associated infections, medical  
443 devices and biofilms: risk, tolerance and control. *J. Med. Microbiol.* **64**, 323–334 (2015).
- 444 8. Roberts, A. E. L., Kragh, K. N., Bjarnsholt, T. & Diggie, S. P. The Limitations of In Vitro  
445 Experimentation in Understanding Biofilms and Chronic Infection. *J. Mol. Biol.* **427**, 3646–3661  
446 (2015).
- 447 9. Carvalho, G., Balestrino, D., Forestier, C. & Mathias, J.-D. How do environment-dependent switching  
448 rates between susceptible and persister cells affect the dynamics of biofilms faced with antibiotics?  
449 *Npj Biofilms Microbiomes* **4**, (2018).
- 450 10. Costerton, J. Introduction to biofilm. *Int. J. Antimicrob. Agents* **11**, 217–221 (1999).
- 451 11. Serra, D. O., Richter, A. M., Klauck, G., Mika, F. & Hengge, R. Microanatomy at Cellular Resolution  
452 and Spatial Order of Physiological Differentiation in a Bacterial Biofilm. *mBio* **4**, e00103-13-e00103-  
453 13 (2013).
- 454 12. Ghanbari, A. *et al.* Inoculation density and nutrient level determine the formation of mushroom-  
455 shaped structures in *Pseudomonas aeruginosa* biofilms. *Sci. Rep.* **6**, (2016).
- 456 13. Sheraton, M. V. *et al.* Mesoscopic Energy Minimization Drives *Pseudomonas aeruginosa* Biofilm  
457 Morphologies and Consequent Stratification of Antibiotic Activity Based on Cell Metabolism.  
458 *Antimicrob. Agents Chemother.* **62**, (2018).
- 459 14. Libicki, S. B., Salmon, P. M. & Robertson, C. R. The effective diffusive permeability of a nonreacting  
460 solute in microbial cell aggregates. *Biotechnol. Bioeng.* **32**, 68–85 (1988).
- 461 15. Hunt, S. M., Werner, E. M., Huang, B., Hamilton, M. A. & Stewart, P. S. Hypothesis for the Role of  
462 Nutrient Starvation in Biofilm Detachment. *Appl. Environ. Microbiol.* **70**, 7418–7425 (2004).
- 463 16. Stewart, P. S. Diffusion in Biofilms. *J. Bacteriol.* **185**, 1485–1491 (2003).
- 464 17. Guélon, T., Mathias, J.-D. & Deffuant, G. Influence of spatial structure on effective nutrient diffusion in  
465 bacterial biofilms. *J. Biol. Phys.* **38**, 573–588 (2012).
- 466 18. Rudge, T. J., Steiner, P. J., Phillips, A. & Haseloff, J. Computational Modeling of Synthetic Microbial  
467 Biofilms. *ACS Synth. Biol.* **1**, 345–352 (2012).
- 468 19. Rudge, T. J., Federici, F., Steiner, P. J., Kan, A. & Haseloff, J. Cell Polarity-Driven Instability  
469 Generates Self-Organized, Fractal Patterning of Cell Layers. *ACS Synth. Biol.* **2**, 705–714 (2013).
- 470 20. Blanchard, A. E. & Lu, T. Bacterial social interactions drive the emergence of differential spatial  
471 colony structures. *BMC Syst. Biol.* **9**, (2015).
- 472 21. Smith, W. P. J. *et al.* Cell morphology drives spatial patterning in microbial communities. *Proc. Natl.*  
473 *Acad. Sci.* **114**, E280–E286 (2017).
- 474 22. Goldschmidt, F., Regoes, R. R. & Johnson, D. R. Successive range expansion promotes diversity  
475 and accelerates evolution in spatially structured microbial populations. *ISME J.* **11**, 2112 (2017).
- 476 23. Jauffred, L., Vejborg, R. M., Korolev, K. S., Brown, S. & Oddershede, L. B. Chirality in microbial  
477 biofilms is mediated by close interactions between the cell surface and the substratum. *ISME J.* **11**,  
478 1688 (2017).

- 479 24. Eriksen, R. S., Svenningsen, S. L., Sneppen, K. & Mitarai, N. A growing microcolony can survive and  
480 support persistent propagation of virulent phages. *Proc. Natl. Acad. Sci.* **115**, 337–342 (2018).
- 481 25. Xiao, J. *et al.* Biofilm three-dimensional architecture influences in situ pH distribution pattern on the  
482 human enamel surface. *Int. J. Oral Sci.* **9**, 74–79.
- 483 26. Liu, J. *et al.* Coupling between distant biofilms and emergence of nutrient time-sharing. *Science* **356**,  
484 638–642 (2017).
- 485 27. McConnell, G. *et al.* A novel optical microscope for imaging large embryos and tissue volumes with  
486 sub-cellular resolution throughout. *eLife* **5**, e18659 (2016).
- 487 28. McConnell, G. & Amos, W. B. Application of the Mesolens for subcellular resolution imaging of intact  
488 larval and whole adult *Drosophila*. *J. Microsc.* **270**, 252–258 (2018).
- 489 29. Schniete, J. *et al.* Fast Optical Sectioning for Widefield Fluorescence Mesoscopy with the Mesolens  
490 based on HiLo Microscopy. *Sci. Rep.* **8**, (2018).
- 491 30. Drescher, K. *et al.* Architectural transitions in *Vibrio cholerae* biofilms at single-cell resolution. *Proc.*  
492 *Natl. Acad. Sci.* **113**, E2066–E2072 (2016).
- 493 31. Yan, J., Sharo, A. G., Stone, H. A., Wingreen, N. S. & Bassler, B. L. *Vibrio cholerae* biofilm growth  
494 program and architecture revealed by single-cell live imaging. *Proc. Natl. Acad. Sci.* **113**, E5337–  
495 E5343 (2016).
- 496 32. Hartmann, R. *et al.* Emergence of three-dimensional order and structure in growing biofilms. *Nat.*  
497 *Phys.* **15**, 251–256 (2019).
- 498 33. Lagree, K., Desai, J. V., Finkel, J. S. & Lanni, F. Microscopy of fungal biofilms. *Curr. Opin. Microbiol.*  
499 **43**, 100–107 (2018).
- 500 34. Xiao, J. *et al.* Biofilm three-dimensional architecture influences in situ pH distribution pattern on the  
501 human enamel surface. *Int. J. Oral Sci.* **9**, 74–79 (2017).
- 502 35. Thomsen, H. *et al.* Delivery of cyclodextrin polymers to bacterial biofilms — An exploratory study  
503 using rhodamine labelled cyclodextrins and multiphoton microscopy. *Int. J. Pharm.* **531**, 650–657  
504 (2017).
- 505 36. Shemesh, H. *et al.* High frequency ultrasound imaging of a single-species biofilm. *J. Dent.* **35**, 673–  
506 678 (2007).
- 507 37. Vaidya, K., Osgood, R., Ren, D., Pichichero, M. E. & Helguera, M. Ultrasound Imaging and  
508 Characterization of Biofilms Based on Wavelet De-noised Radiofrequency Data. *Ultrasound Med.*  
509 *Biol.* **40**, 583–595 (2014).
- 510 38. Xi, C., Marks, D., Schlachter, S., Luo, W. & Boppart, S. A. High-resolution three-dimensional imaging  
511 of biofilm development using optical coherence tomography. *J. Biomed. Opt.* **11**, 034001 (2006).
- 512 39. Wagner, M., Taherzadeh, D., Haisch, C. & Horn, H. Investigation of the mesoscale structure and  
513 volumetric features of biofilms using optical coherence tomography. *Biotechnol. Bioeng.* **107**, 844–  
514 853 (2010).
- 515 40. Leite de Andrade, M. C. *et al.* A new approach by optical coherence tomography for elucidating  
516 biofilm formation by emergent *Candida* species. *PLOS ONE* **12**, e0188020 (2017).
- 517 41. Drury, W. J., Characklis, W. G. & Stewart, P. S. Interactions of 1  $\mu\text{m}$  latex particles with  
518 *Pseudomonas aeruginosa* biofilms. *Water Res.* **27**, 1119–1126 (1993).
- 519 42. Stoodley, P., Lewandowski, Z. & others. Liquid flow in biofilm systems. *Appl. Environ. Microbiol.* **60**,  
520 2711–2716 (1994).
- 521 43. Asally, M. *et al.* Localized cell death focuses mechanical forces during 3D patterning in a biofilm.  
522 *Proc. Natl. Acad. Sci.* **109**, 18891–18896 (2012).



- 523 44. Wilking, J. N. *et al.* Liquid transport facilitated by channels in *Bacillus subtilis* biofilms. *Proc. Natl. Acad. Sci.* **110**, 848–852 (2013).  
524
- 525 45. Kempes, C. P., Okegbe, C., Mears-Clarke, Z., Follows, M. J. & Dietrich, L. E. P. Morphological  
526 optimization for access to dual oxidants in biofilms. *Proc. Natl. Acad. Sci.* **111**, 208–213 (2014).
- 527 46. Jo, J., Cortez, K. L., Cornell, W. C., Price-Whelan, A. & Dietrich, L. E. An orphan cbb3-type  
528 cytochrome oxidase subunit supports *Pseudomonas aeruginosa* biofilm growth and virulence. *30*  
529 (2017).
- 530 47. Nuñez, I. N. *et al.* Artificial Symmetry-Breaking for Morphogenetic Engineering Bacterial Colonies.  
531 *ACS Synth. Biol.* **6**, 256–265 (2017).
- 532 48. Wimpenny, J. W. T. & Coombs, J. P. Penetration of oxygen into bacterial colonies. *Microbiology* **129**,  
533 1239–1242 (1983).
- 534 49. Peters, A. C., Wimpenny, J. W. T. & Coombs, J. P. Oxygen Profiles in, and in the Agar Beneath,  
535 Colonies of *Bacillus cereus*, *Staphylococcus albus* and *Escherichia coli*. *J. Gen. Microbiol.* **133**, 1257–1263 (1987).  
536
- 537 50. Jeanson, S., Flourey, J., Gagnaire, V., Lortal, S. & Thierry, A. Bacterial Colonies in Solid Media and  
538 Foods: A Review on Their Growth and Interactions with the Micro-Environment. *Front. Microbiol.* **6**,  
539 (2015).
- 540 51. Hwang, G. *et al.* Simultaneous spatiotemporal mapping of in situ pH and bacterial activity within an  
541 intact 3D microcolony structure. *Sci. Rep.* **6**, (2016).
- 542 52. Webb, J. S. *et al.* Cell Death in *Pseudomonas aeruginosa* Biofilm Development. *J. Bacteriol.*  
543 **185**, 4585–4592 (2003).
- 544 53. Moscona, A. A. Aggregation of sponge cells: Cell-linking macromolecules and their role in the  
545 formation of multicellular systems. *In Vitro* **3**, 13–21 (1967).
- 546 54. Lavrov, A. I. & Kosevich, I. A. Sponge cell reaggregation: Mechanisms and dynamics of the process.  
547 *Russ. J. Dev. Biol.* **45**, 205–223 (2014).
- 548 55. Xu, H., Dauparas, J., Das, D., Lauga, E. & Wu, Y. Self-organization of swimmers drives long-range  
549 fluid transport in bacterial colonies. *Nat. Commun.* **10**, (2019).
- 550 56. Jolivet-Gougeon, A. & Bonnaure-Mallet, M. Biofilms as a mechanism of bacterial resistance. *Drug*  
551 *Discov. Today Technol.* **11**, 49–56 (2014).
- 552 57. Elbing, K. L. & Brent, R. Recipes and Tools for Culture of *Escherichia coli*. *Curr. Protoc. Mol. Biol.*  
553 **125**, e83 (2019).
- 554 58. Dempster, J., Wokosin, D. L., McCloskey, K. D., Girkin, J. M. & Gurney, A. M. WinFluor: an  
555 integrated system for the simultaneous recording of cell fluorescence images and  
556 electrophysiological signals on a single computer system. *Br. J. Pharmacol.* **137**, 146 (2002).
- 557 59. Lambertsen, L., Sternberg, C. & Molin, S. Mini-Tn7 transposons for site-specific tagging of bacteria  
558 with fluorescent proteins. *Environ. Microbiol.* **6**, 726–732 (2004).
- 559 60. Schindelin, J. *et al.* Fiji: an open-source platform for biological-image analysis. *Nat. Methods* **9**, 676–  
560 682 (2012).

## 562 Figure Legends

563 Figure 1. **Visualising the intra-colony channel system of *E. coli* macro-colony biofilms.** A  
564 deconvolved 36  $\mu\text{m}$ -thick transverse sub-stack of a mature *E. coli* macro-colony biofilm acquired  
565 using widefield mesoscopy. An axial colour-coded LUT has been applied which indicates the  
566 relative position of each cell within the context of the biofilm. A magnified ROI is presented where  
567 individual cells can be clearly resolved. Channel structures are seen to permeate throughout the  
568 biofilm and present a 3D topography within the context of the biofilm.

569 Figure 2. **Characterising the structure of intra-colony channels.** (a) Maximum intensity  
570 projection of an unlabelled JM105 colony acquired using reflection confocal mesoscopy, with a  
571 single isolated optical section shown. Reflection imaging determined that intra-colony channels  
572 were not occupied by material of differing refractive index to the biomass. The colony-medium  
573 interface can be observed clearly, while there is no evident structure within the colony. (b). Signal  
574 from non-viable cells (yellow) was subtracted from viable cells to negate any spectral overlap in  
575 the emission of Sytox Green and HcRed1. A composite maximum intensity projection of the entire  
576 colony is presented. Intra-colony channels in the viable cell population (cyan) did not contain any  
577 non-viable cells. (c) Alexa594-WGA-stained EPS residues (magenta) were not present in the  
578 intra-colony channels when compared with elsewhere in the biofilm, meaning channels were not  
579 composed of an EPS-based matrix. (d) Nile Red-stained lipids (red) clustered in the centre of *E.*  
580 *coli* biofilms while intra-colony channels remain unstained by Nile Red. Therefore, intra-colony  
581 channels were not composed of lipids. (e) Emission of SYPRO Ruby-stained extracellular proteins  
582 (magenta) mimicked the spatial patterns of intra-colony channels, showing that channels were  
583 filled by a protein-based matrix.

584 Figure 3. **Intra-colony channels form as an emergent property of biofilm formation.** (a) An  
585 unmixed, naïve control biofilm of JM105-miniTn7-*gfp* with established intra-colony channels. (b)  
586 A macro-colony JM105-miniTn7-*gfp* biofilm which was initially grown for 10 hours before  
587 mechanical disruption and subsequent recovery and regrowth at 37°C for a further 10 hours.  
588 Regrowth was accompanied with the re-emergence of intra-colony channels in the outgrown  
589 region of the disrupted colony, showing that channel formation is an emergent property of macro-  
590 colony biofilm development.

591 Figure 4. **Intra-colony channels are confined within clonal populations and unable to cross**  
592 **strain boundaries.** A mixed culture of isogenic JM105 strains which express either GFP (cyan)

593 or HcRed1 (magenta). Each strain sectored into segregated clonal populations which have  
594 propagated from a single colony forming unit, and cells from each sector were unable to cross  
595 the strain boundary. The intra-colony channels present within each sector were also unable to  
596 cross the strain boundary and were therefore not shared by opposing isogenic colonies.

597 **Figure 5. Intra-colony channels facilitate transport of microscopic particles.** A single optical  
598 section approximately 25  $\mu\text{m}$  above the base of the colony shows a mature JM105-miniTn7-*gfp*  
599 biofilm (green) and a lawn of 200 nm fluorescent microspheres (magenta). The fluorescent  
600 microspheres were transported from a confluent lawn at the base of the colony into the intra-  
601 colony channels and directed towards the centre of the colony. Two ROIs are presented from  
602 different regions of the colony where fluorescent microspheres were transported into the colony  
603 via intra-colony channels.

604 **Figure 6. Intra-colony channels play a functional role in nutrient acquisition and transport**  
605 **to the centre of bacterial biofilms.** A deconvolved image of a JM105-pJM058 macro-colony  
606 biofilm grown on M9 minimal medium with L-arabinose as the sole carbon source. This arabinose  
607 biosensor expresses GFP only in the presence of L-arabinose. GFP emission intensity was higher  
608 in cells which line the intra-colony channels compared to cells elsewhere within the biofilm, which  
609 shows that the channel structures have a higher concentration of L-arabinose compared to  
610 elsewhere within the biofilm. This provides evidence of a functional role in nutrient acquisition and  
611 transport for the intracolony channel system.

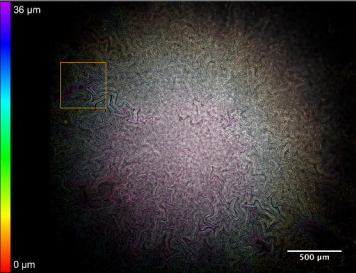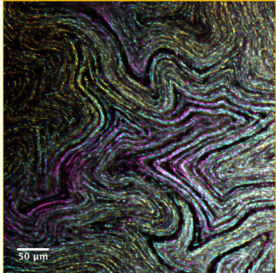

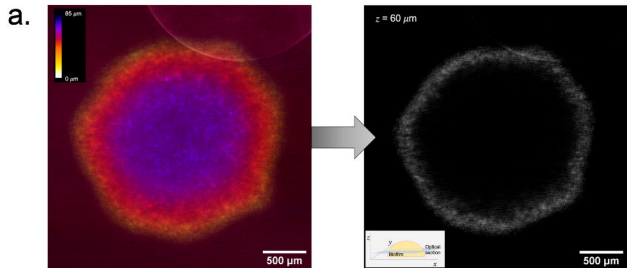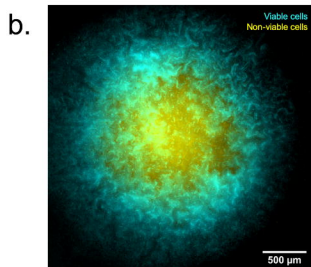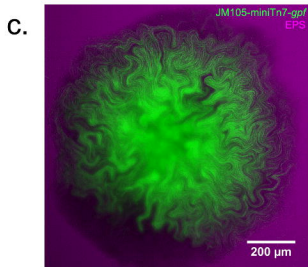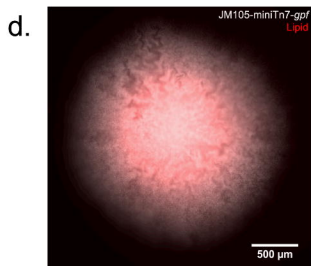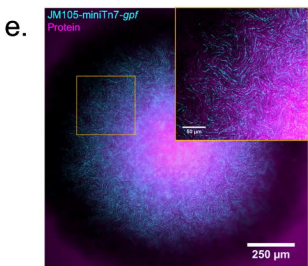

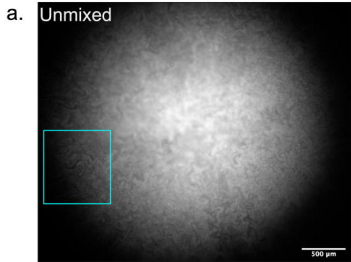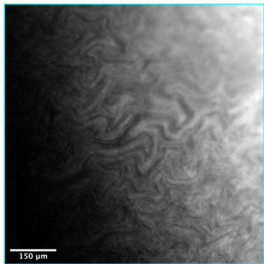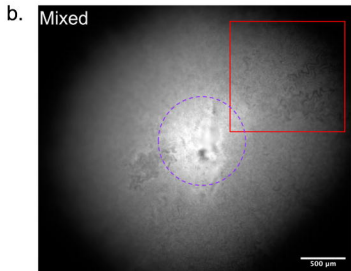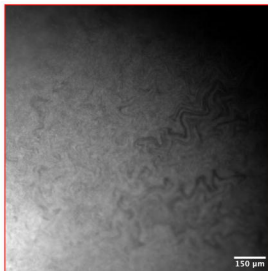

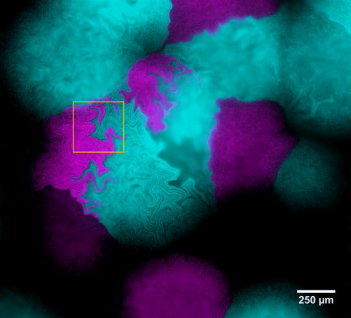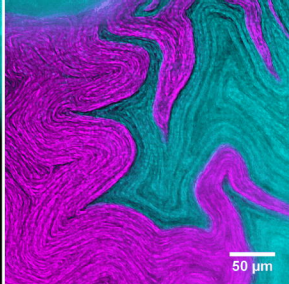

JM105-miniTn7-*gfp*  
JM105-miniTn7-*HcRed1*

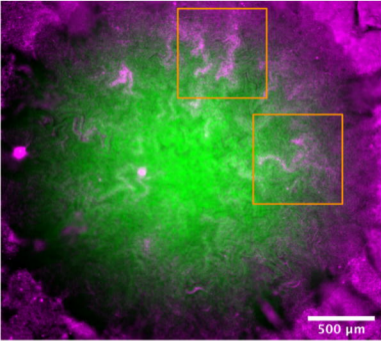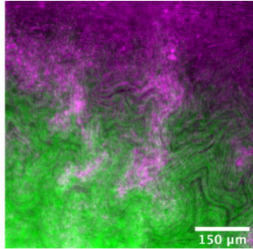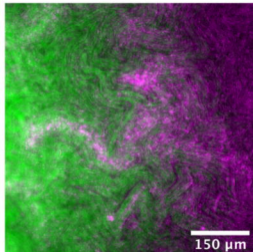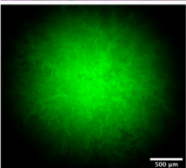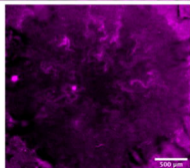



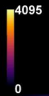

200  $\mu\text{m}$

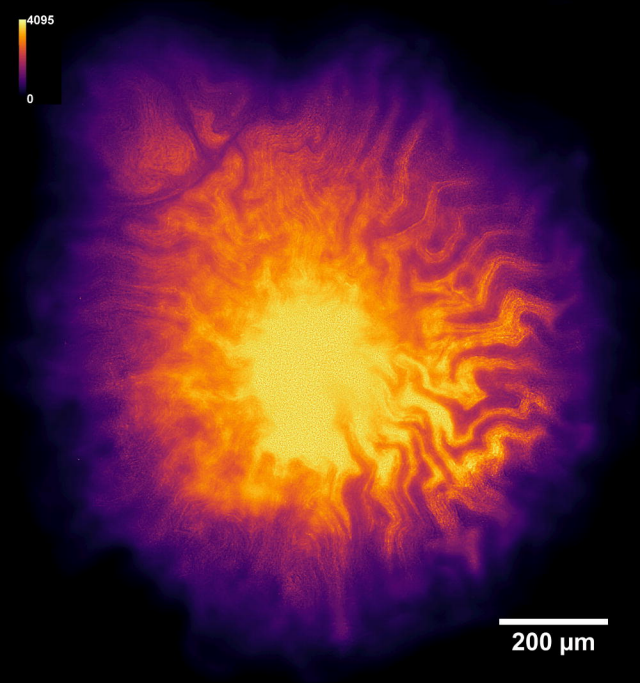

Source: https://www.biorxiv.org/content/biorxiv/early/2019/11/26/851428.full.pdf
